# Supplementary material for: The Effects of Monomer, Crosslinking Agent, and Filler Concentrations on the Viscoelastic and Swelling Properties of Poly(methacrylic acid) Hydrogels: A Comparison
Source: MDPI journal article supplement (doi:10.3390/ma14092305), 2021-04-29
Supplement: s1 [file s1]

Supplementary Material

# The Effects of Monomer, Crosslinking Agent, and Filler Concentrations on the Viscoelastic and Swelling Properties of poly(methacrylic acid) Hydrogels: A Comparison

Claudia Mihaela Ninciuleanu <sup>1,2</sup>, Raluca Ianchis <sup>1</sup>, Elvira Alexandrescu <sup>1</sup>, Catalin Ionut Mihaescu <sup>1</sup>, Cristina Scomoroscenco <sup>1</sup>, Cristina Lavinia Nistor <sup>1</sup>, Silviu Preda <sup>3</sup>, Cristian Petcu <sup>1,\*</sup> and Mircea Teodorescu <sup>2,\*</sup>

<sup>1</sup> National Institute for Research and Development in Chemistry and Petrochemistry-ICECHIM, Spl. Independentei 202, 060021 Bucharest, Romania; claudia.ninciuleanu@yahoo.com (C.M.N.); ralumoc@yahoo.com (R.I.); elviraalexandrescu@yahoo.com (E.A.); mihaescu\_catalin96@yahoo.com (C.I.M.); scomoroscencocristina@gmail.com (C.S.); lc\_nistor@yahoo.com (C.L.N.)

<sup>2</sup> Department of Bioresources and Polymer Science, Faculty of Applied Chemistry and Materials Science, Politehnica University of Bucharest, 1-7 Gh. Polizu Street, 011061 Bucharest, Romania

<sup>3</sup> Institute of Physical Chemistry "Ilie Murgulescu", Romanian Academy, Spl. Independentei 202, 6th district, P.O. Box 194, 060021 Bucharest, Romania; predas01@yahoo.co.uk

\* Correspondence: cpetcu@icf.ro (C.P.); mircea.teodorescu@upb.ro (M.T.)

**Citation:** Ninciuleanu, C.M.; Ianchis, R.; Alexandrescu, E.; Mihaescu, C.I.; Scomoroscenco, C.; Nistor, C.L.; Preda, S.; Petcu, C.; Teodorescu, M. The Effects of Monomer, Crosslinking Agent and Filler Concentrations upon the Viscoelastic and Swelling Properties of poly(methacrylic acid) Hydrogels: A Comparison. *Materials* **2021**, *14*, 2305. <https://doi.org/10.3390/ma14092305>

Academic Editor: Isabel Izquierdo Barba

Received: 10 March 2021

Accepted: 27 April 2021

Published: 29 April 2021

**Publisher's Note:** MDPI stays neutral with regard to jurisdictional claims in published maps and institutional affiliations.

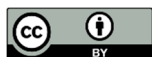

**Copyright:** © 2021 by the authors. Licensee MDPI, Basel, Switzerland. This article is an open access article distributed under the terms and conditions of the Creative Commons Attribution (CC BY) license (<http://creativecommons.org/licenses/by/4.0/>).

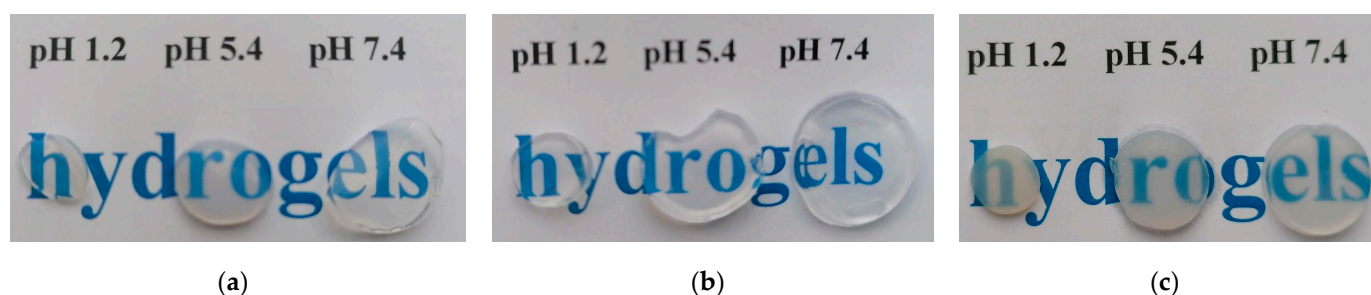

**Figure S1.** The appearance of hydrogels at different pH values: (a) **SH sample** (10%MAA-2%BIS-0%MMT); (b) **H1%BIS sample** (10%MAA-1%BIS-0%MMT); (c) **H2%MMT** (10%MAA-2%BIS-2%MMT).

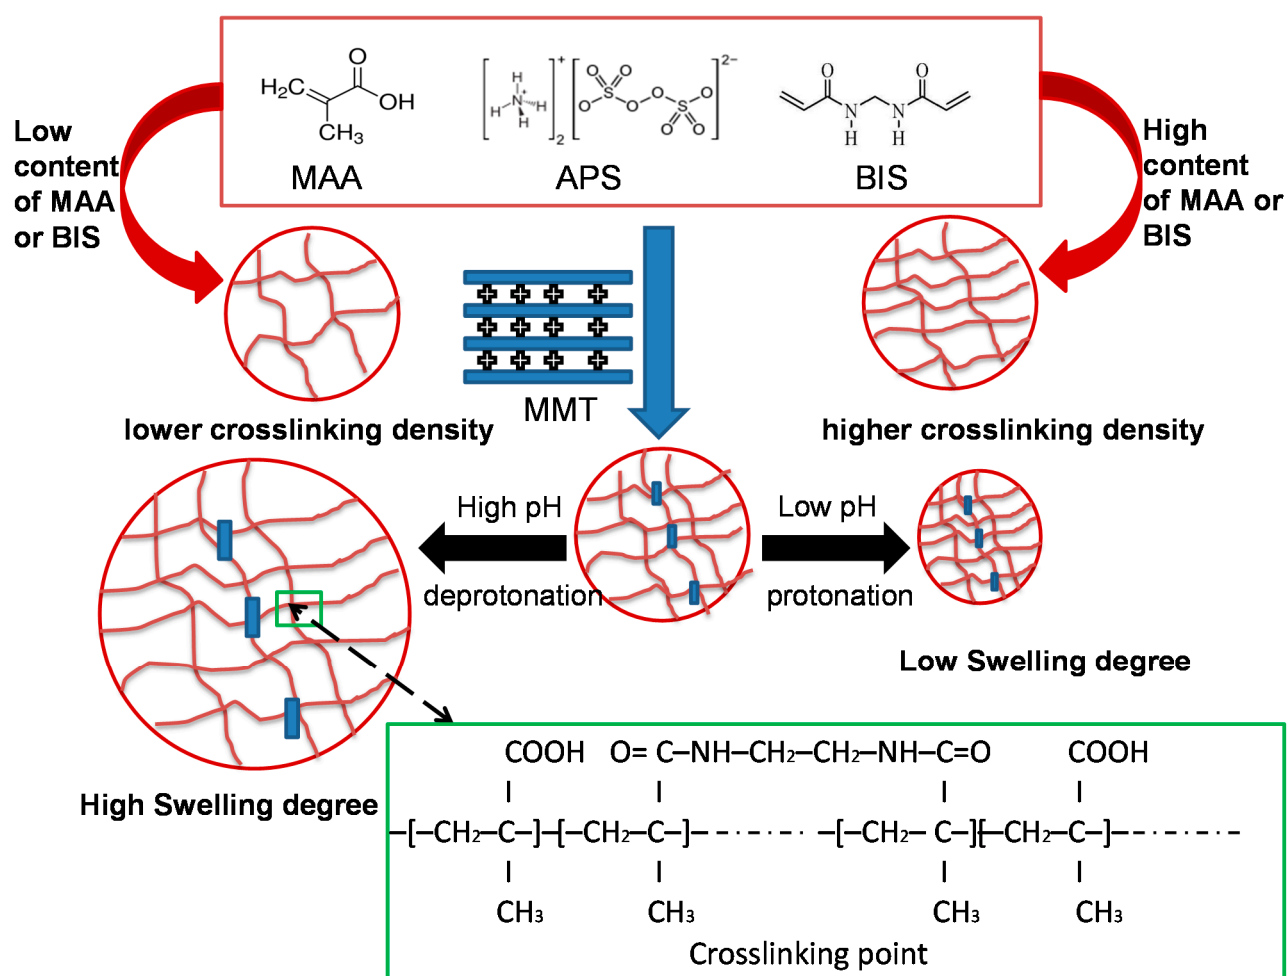

**Figure S2.** Mechanism of the swelling process.

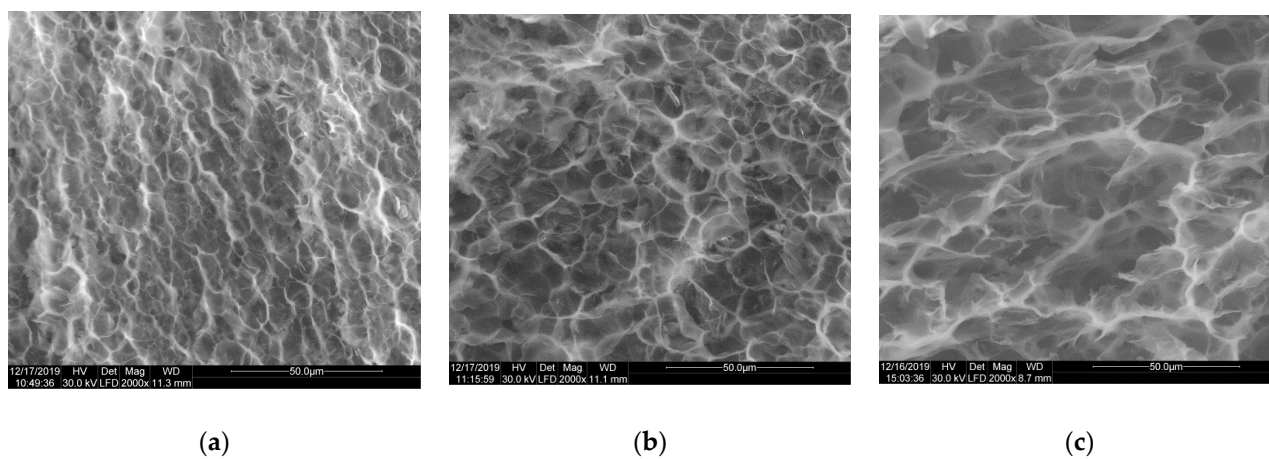

**Figure S3.** SEM micrographs of lyophilized H2%MMT samples swollen at different pH values: (a) pH 1.2; (b) pH 5.4; (c) pH 7.4.
